# Supplementary material for: A versatile resolving agent for diffusion edited separation of enantiomers, complex mixtures and constitutional isomers
Source: Royal Society of Chemistry journal article supplement (doi:10.1039/c2ra20982a), 2012-01-01
Supplement: c2ra20982a.pdf [file c2ra20982a.pdf]

**Supporting Information**

**A Versatile Resolving Agent for Diffusion  
Edited Separation of Enantiomers, Complex  
Mixtures and Constitutional Isomers**

**Sachin Rama Chaudhari<sup>a,b</sup>, Srinivasa<sup>a</sup> and N. Suryaprakash<sup>a\*</sup>**

**<sup>a</sup>NMR Research Center and <sup>b</sup>Solid State and Structural Chemistry Unit**

**Indian Institute of Science**

**Bangalore, India, 560012**

**S1: Sample Preparation**

**S2: Experimental Details**

**S3: Chemical Structures of the molecules**

**S4: 400 MHz  $^{19}\text{F}$  DOSY spectrum of 2-trifluoromethylaniline, 2-trifluoromethylphenol (sample consisted of 15 mg of analyte (each) in 0.5 ml of  $\text{CDCl}_3$ ).**

**S5: 400 MHz  $^{19}\text{F}$  DOSY spectrum of 2-trifluoromethylaniline, 2-trifluoromethylphenol after the addition of 180 mg of crown ether. (Sample consisted of 10 mg of analyte (each) in 0.5 ml of  $\text{CDCl}_3$ ). Red, blue dotted lines represent 2-trifluoromethylaniline, 2-trifluoromethylphenol.**

**S6: Table of diffusion coefficients**

### Sample preparation

The stock solution of samples ortho-, meta- and para- chloroaniline was prepared by taking 10 mg of each isomer in 3 ml of CDCl<sub>3</sub> solution (sample 1). The <sup>1</sup>H-DOSY spectrum was recorded at 298 K. To this solution the stepwise addition of 20 mg of crown ether was carried out and each time <sup>1</sup>H DOSY spectrum was recorded till the crown ether and solute attain 1:1 ratio. The best separation was achieved when 60 mg of crown ether was dissolved in 3 ml of CDCl<sub>3</sub> containing 10 mg of the solute (sample 2). The 10 mg mixture of 2-trifluoromethylaniline and 2-trifluoromethylphenol in 0.5 ml of CDCl<sub>3</sub> (sample 3). In the case of 2-trifluoromethylaniline and 2-trifluoromethylphenol, we have chosen 1:1 complex (Sample consisted of 10 mg of analyte (each) in 2 ml of CDCl<sub>3</sub>) (sample 4). The 4 mg of 2-methylpiperidine, in 0.5 ml of CDCl<sub>3</sub> (sample 5). For the enantiomer discrimination in 2-methylpiperidine, incremental addition of 2 mg of Chiral crown ether in 2-methylpiperidine solution was carried out (sample 6). The best separation was achieved when the mixture pertains to 1mg of 2-methylpiperidine and 4.5 mg of crown ether. Nevertheless due to the high solubility of crown ether the solution was not viscous.

## Experimental Details

All the NMR experiments were carried out on 400 MHz using Bruker Avance-III NMR spectrometer with a total sample volume of nearly 500  $\mu\text{L}$  taken in a 5 mm NMR tube. The sample temperature was maintained at 298 K using BVT-3000 temperature controller. The DOSY experiments were performed using the pulse sequence available in the Bruker library (ledbpgp2s), with stimulated echo, longitudinal eddy current compensation, bipolar gradient pulses, and two homo spoil gradients using 16 different gradient values varying from 2 to 95% of the maximum available gradient strength. Diffusion delay ranging from 100 to 1000 ms and bipolar gradient pulses from 1 to 5 ms were employed. The longitudinal eddy current delay was kept constant at 5 ms in all the experiments, whereas the gradient pulse recovery time was set to 200  $\mu\text{s}$ . The gradient length was set to 2.2 ms for all the experiments. The data was processed using 65536 points in the  $F_2$  dimension and 256 points in  $F_1$  dimension. The line-width factor (LWF) set to 1 permitted the measurement of peak widths in the diffusion dimension

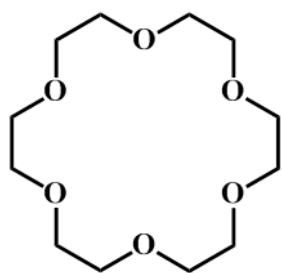

18-crown-6

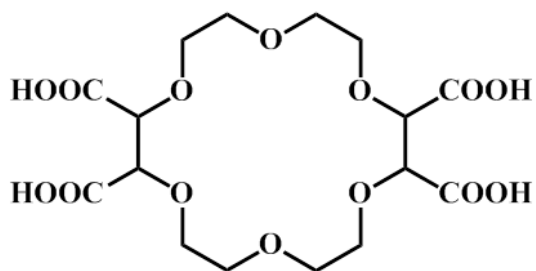

(18-Crown-6)-2,3,11,12-tetracarboxylic acid

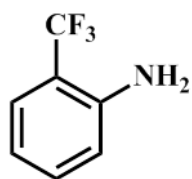

2-Chloroaniline

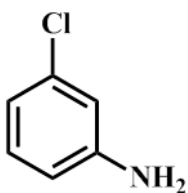

3-Chloroaniline

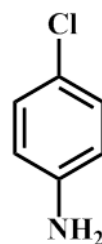

4-Chloroaniline

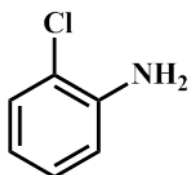

2-Trifluoromethylaniline

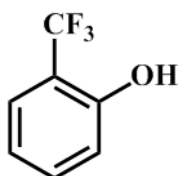

2-Trifluoromethylphenol

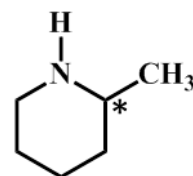

2-methylpiperidine

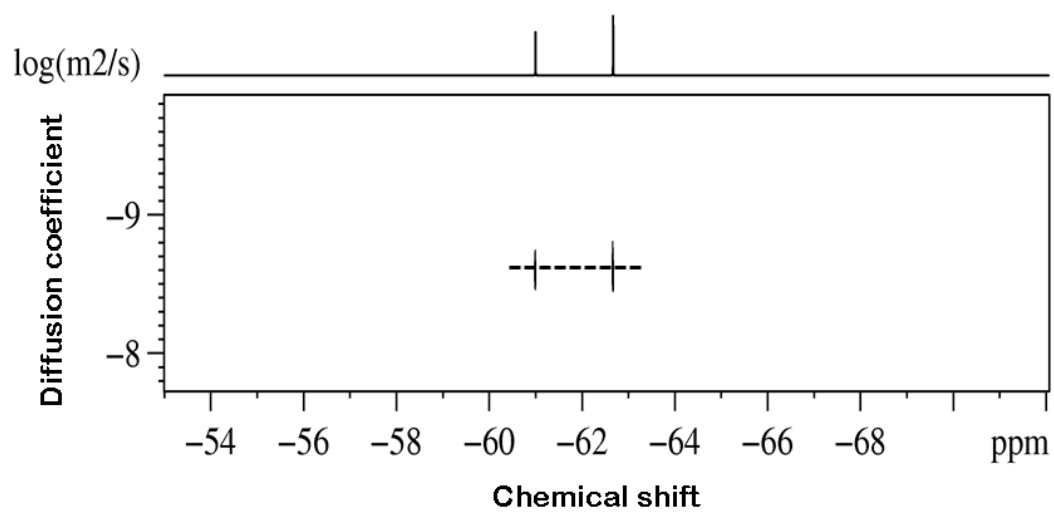

**S4**

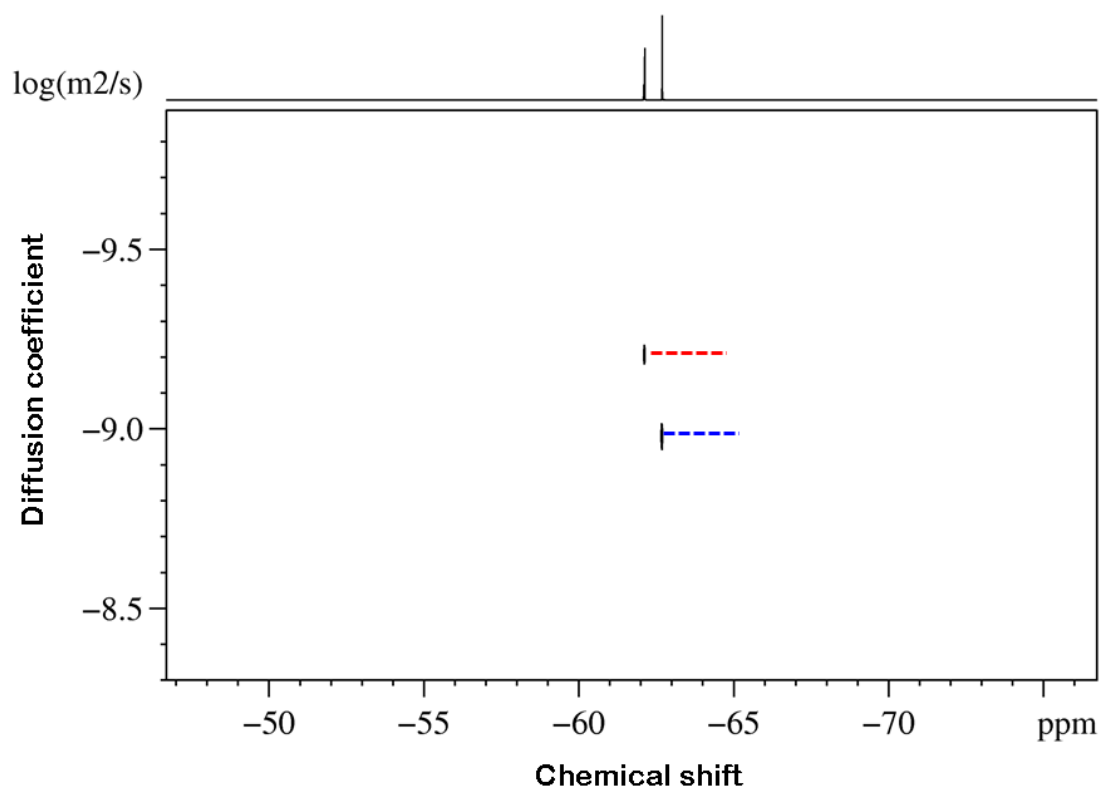

**S5**

**Table 1:** The measured diffusion coefficients for investigated molecules in the free and complexed stated with crown-ether. The errors are given in parenthesis.

| Molecule                        | Diffusion Coefficient *10 <sup>-9</sup> (m <sup>2</sup> /s) |                                  |
|---------------------------------|-------------------------------------------------------------|----------------------------------|
|                                 | Free state                                                  | Complexed state with crown ether |
| <b>o-chloroaniline</b>          | } 2.36 (3%)                                                 | 1.68(1.5%)                       |
| <b>m-chloroaniline</b>          |                                                             | 1.60(1.3%)                       |
| <b>p-chloroaniline</b>          |                                                             | 1.49(2.4%)                       |
| <b>2-Trifluoromethylaniline</b> | } 2.80(2.2%)                                                | 0.80 (6.2%)                      |
| <b>2-Trifluoromethylphenol</b>  |                                                             | 1.28 (2.6%)                      |
| <b>2-methyl piperidine</b>      | — 1.50 (1.7 %)                                              | R/S-1.25 (1%)                    |
|                                 |                                                             | S/R-1.16 (0.9 %)                 |
